# Supplementary material for: Information spreading by a combination of MEG source estimation and multivariate pattern classification
Source: PubMed Central journal article supplement (PMC6005563; doi:10.1371/journal.pone.0198806), 2018-06-18
Supplement: pone.0198806.s002.pdf [file pone.0198806.s002.pdf]

V1, Condition 2 (50 ms)

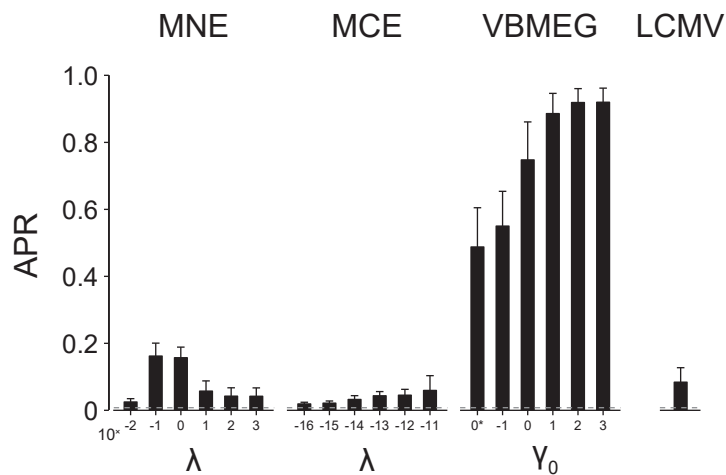

IT, Condition 2 (225 ms)

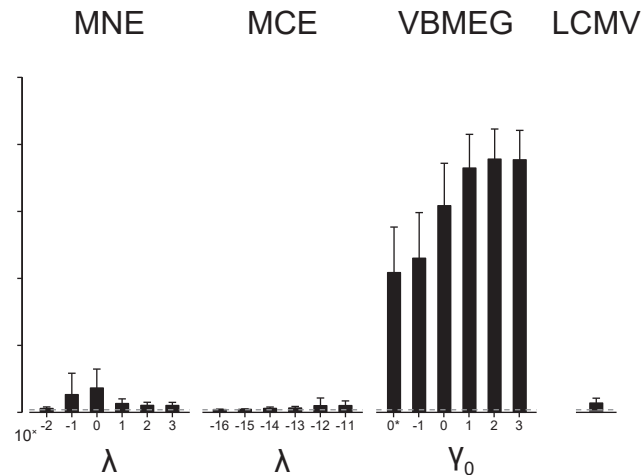

--- Baseline value (0.008)
