# Supplementary material for: Information spreading by a combination of MEG source estimation and multivariate pattern classification
Source: PubMed Central journal article supplement (PMC6005563; doi:10.1371/journal.pone.0198806), 2018-06-18
Supplement: pone.0198806.s005.pdf [file pone.0198806.s005.pdf]

**(a)**MNE  
( $\lambda=10^{-1}$ )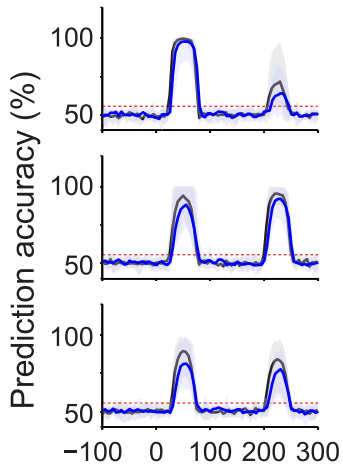**(b)**MCE  
( $\lambda=10^{-12}$ )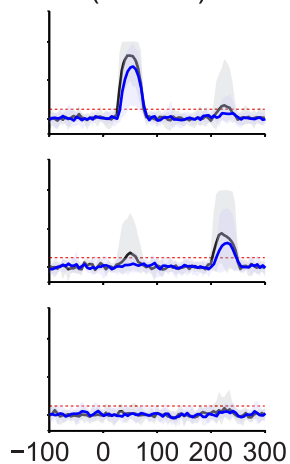**(c)**VBMEG  
( $\gamma_0=10^2$ )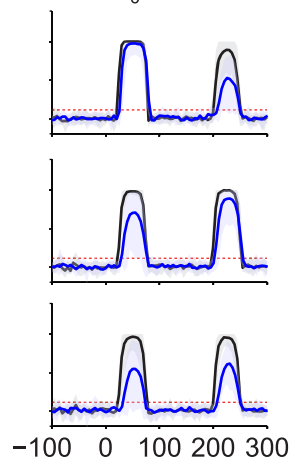**(d)**

LCMV

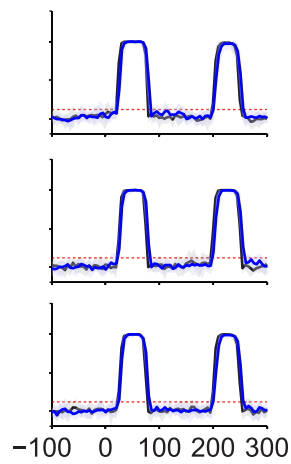

Time (ms)
