# Supplementary material for: Information spreading by a combination of MEG source estimation and multivariate pattern classification
Source: PubMed Central journal article supplement (PMC6005563; doi:10.1371/journal.pone.0198806), 2018-06-18

(a)

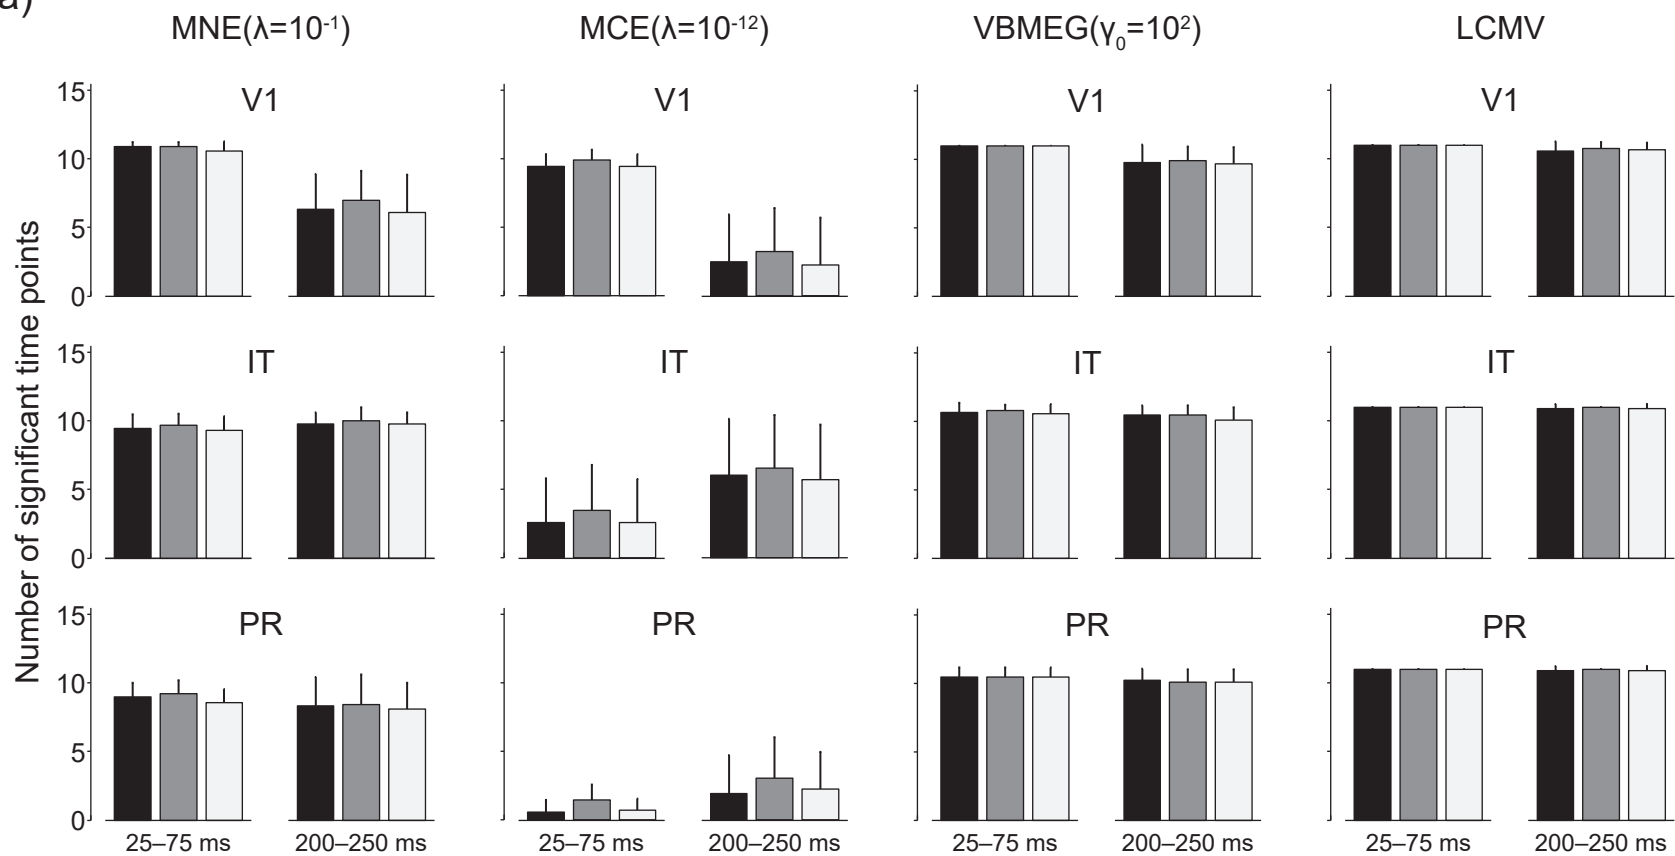

(b)

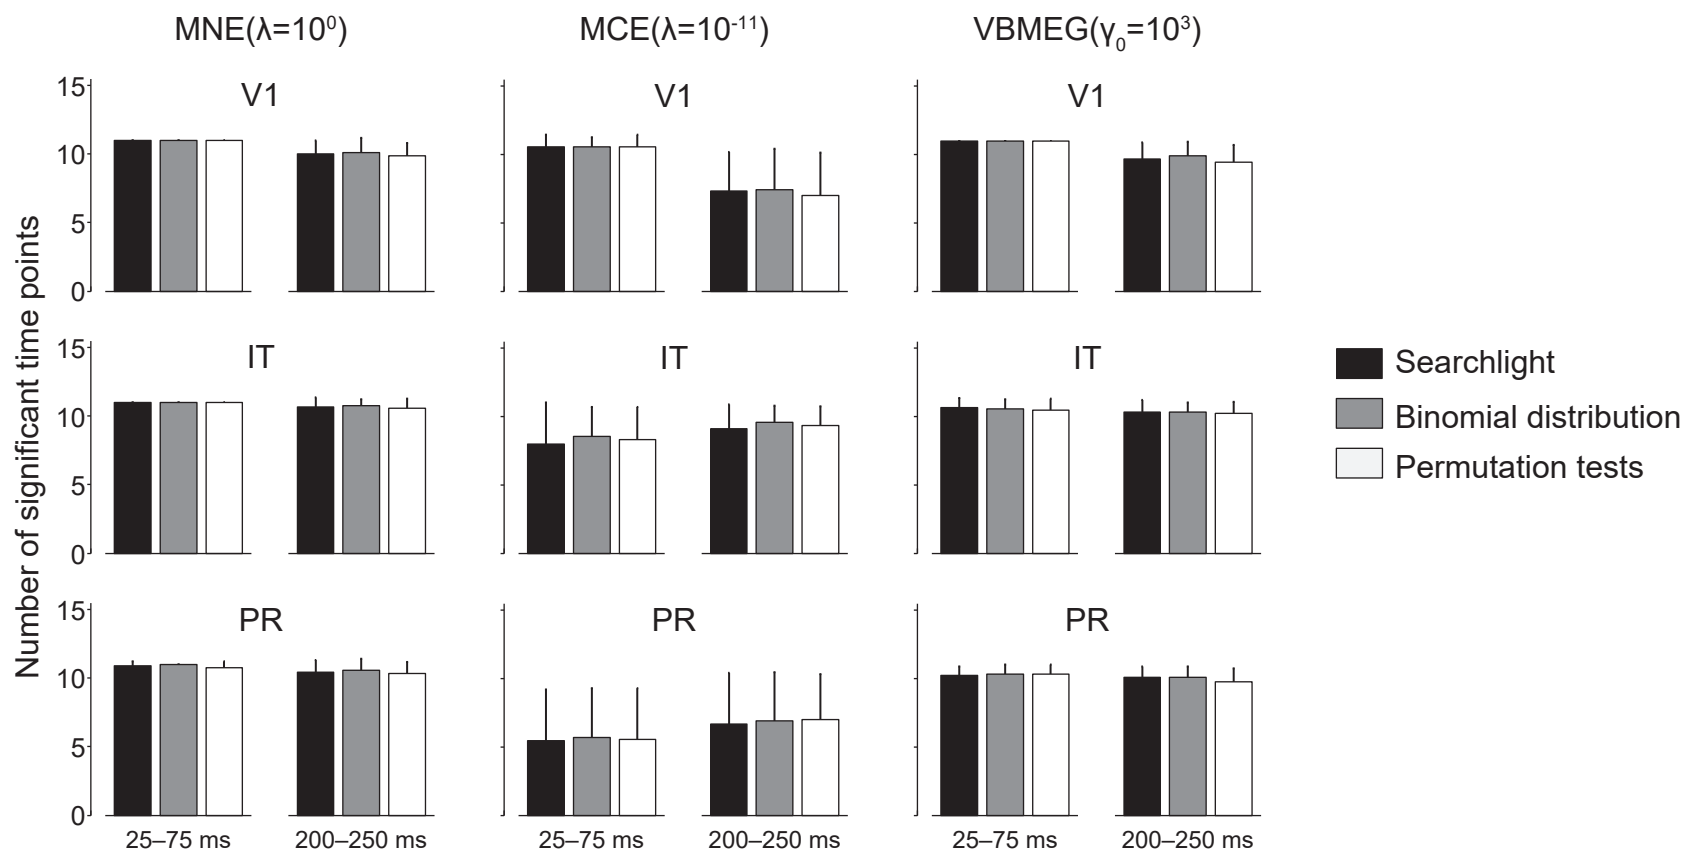

Supplement: pone.0198806.s006.pdf [file pone.0198806.s006.pdf]
