# Supplementary material for: Information spreading by a combination of MEG source estimation and multivariate pattern classification
Source: PubMed Central journal article supplement (PMC6005563; doi:10.1371/journal.pone.0198806), 2018-06-18

**(a)**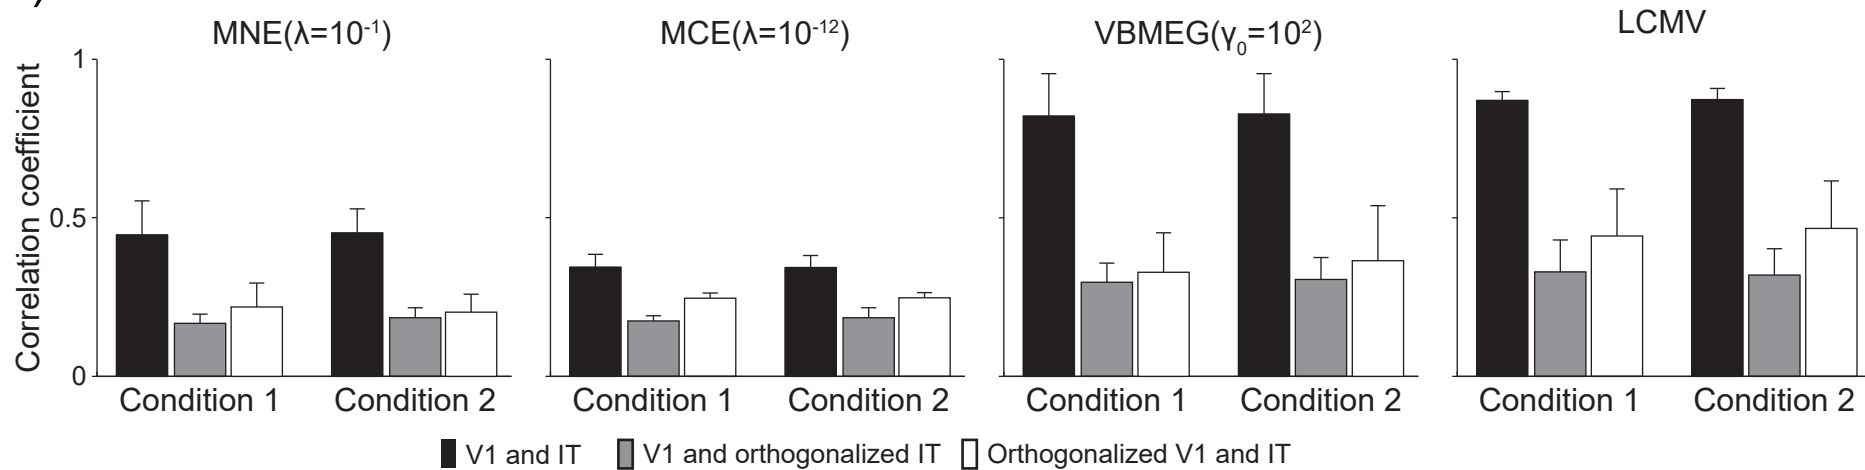**(b)**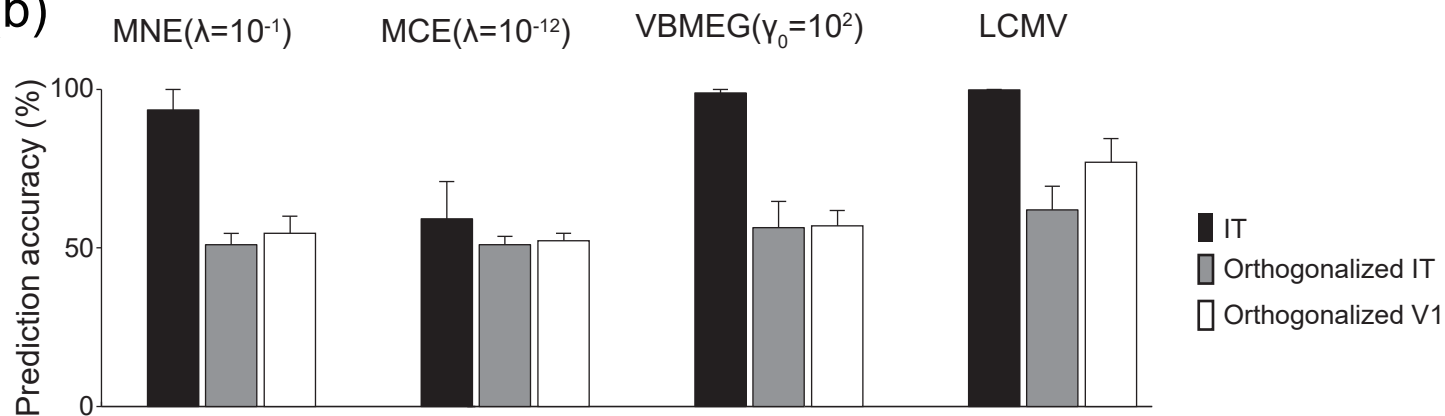**(c)**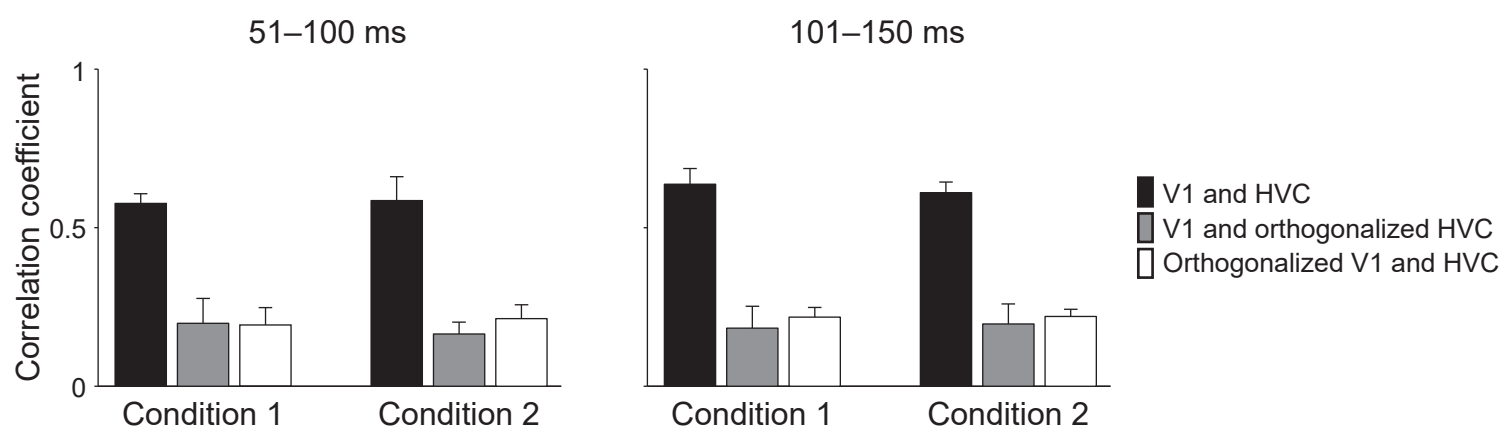**(d)**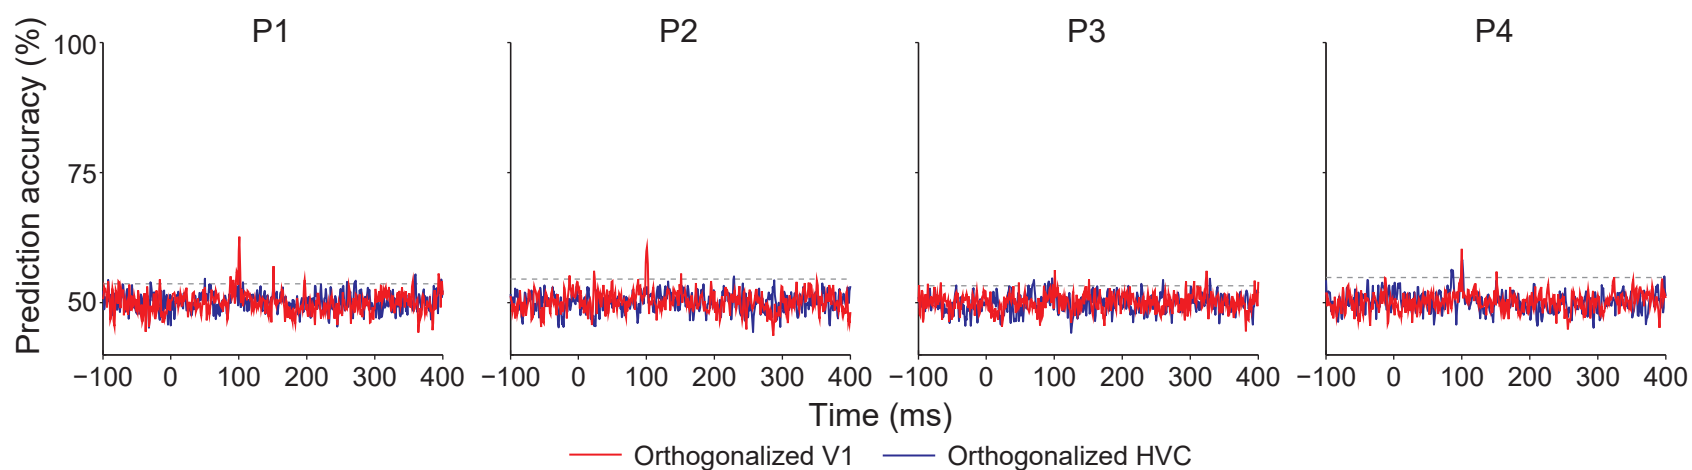

Supplement: pone.0198806.s011.pdf [file pone.0198806.s011.pdf]
